# Supplementary material for: Highly active bimetallic nickel catalysts for alternating copolymerization of carbon dioxide with epoxides
Source: Royal Society of Chemistry journal article supplement (doi:10.1039/d0py00174k), 2020-01-01
Supplement: d0py00174k1.pdf [file d0py00174k1.pdf]

## Highly active bimetallic nickel catalysts for alternating copolymerization of carbon dioxide with epoxides

Yu-Chia Su,<sup>a</sup> Chih-Hsiang Tsui,<sup>a</sup> Chen-Yen Tsai,<sup>b</sup> and Bao-Tsan Ko<sup>\*a</sup>

<sup>a</sup>*Department of Chemistry, National Chung Hsing University, Taichung 402, Taiwan*

<sup>b</sup>*Department of Chemistry, Chinese Culture University, Taipei 111, Taiwan*

\*Corresponding author. E-mail addresses: [btko@dragon.nchu.edu.tw](mailto:btko@dragon.nchu.edu.tw) (B.-T. Ko); Tel: 886-4-22840411-715; Fax: 886-4-22862547.

**Fig. S1** ORTEP drawing of complex **2** with probability ellipsoids drawn at 50% level.

**Fig. S2** ORTEP drawing of complex **3** with probability ellipsoids drawn at 50% level.

**Fig. S3** ORTEP drawing of complex **4** with probability ellipsoids drawn at 60% level.

**Fig. S4** ORTEP drawing of complex **5** with probability ellipsoids drawn at 50% level.

**Fig. S5** Plot of  $M_n$  (■) and PDI (▲) (determined from GPC analysis) vs CHO conversion for the copolymerization of CHO and CO<sub>2</sub> using di-nickel acetate complex **1** as the catalyst ( $[\text{CHO}]_0/[\mathbf{1}]_0 = 10000$ ) at 120 °C and 20.7 bar CO<sub>2</sub>.

**Fig. S6** GPC traces for the afforded PCHC with a bimodal molecular weight distribution catalyzed by di-nickel complex **1** (Table 1, entry 10).

**Fig. S7** <sup>1</sup>H NMR spectrum of the purified PCHC produced at 1 atm of CO<sub>2</sub> pressure by using di-nickel acetate complex **1** (Table 2, entry 1) in CDCl<sub>3</sub>. Peak at  $\delta$  4.65 ppm is assigned to the methine protons in PCHC, and no significant signals at 3.2-3.5 ppm confirms >99% carbonate linkages in PCHC.

**Fig. S8** Plot of  $M_n$  (■) and PDI (▲) (determined from GPC analysis) vs CHO conversion for the copolymerization of CHO and CO<sub>2</sub> using di-Ni complex **1** as the catalyst ( $[\text{CHO}]_0/[\mathbf{1}]_0 = 1600$ ) at 80 °C and 1 atm of CO<sub>2</sub> pressure.

**Fig. S9**  $^1\text{H}$  NMR spectrum of the purified PVCHC produced by using di-nickel acetate complex **1** (Table 3, entry 2) in  $\text{CDCl}_3$ . No significant signal at 3.2-3.5 ppm confirm >99% carbonate linkages in PVCHC.

**Fig. S10**  $^1\text{H}$  NMR spectrum of the purified PCPC afforded by using di-nickel acetate complex **1** (Table 3, entry 5) in  $\text{CDCl}_3$ . Peak at  $\delta = 4.9$  ppm is assigned to the methine protons in PCPC, and no obvious signal at 3.6–4.0 ppm confirms >99% carbonate linkages in PCPC.

**Fig. S11** Plot of  $M_n$  (■) and PDI (▲) (determined from GPC analysis) vs CPO conversion for the copolymerization of cyclopentene oxide and  $\text{CO}_2$  using di-nickel acetate complex **1** as the catalyst ( $[\text{CHO}]_0/[\mathbf{1}]_0 = 1600$ ) at 120 °C and 20.7 bar  $\text{CO}_2$ .

**Fig. S12** The MALDI-TOF spectrum of the obtained PCHC polyol catalyzed by di-Ni complex **1** with the addition of water as a chain transfer agent (Table 3, entry 8).

**Fig. S13** The MALDI-TOF spectrum of the obtained PCHC polyol catalyzed by di-Ni complex **1** (Table 3, entry 9).

**Fig. S14** The MALDI-TOF spectrum of the obtained PVCHC polyol catalyzed by di-Ni complex **1** (Table 3, entry 10).

**Fig. S15** GPC traces for PCHC polyol produced by using di-nickel acetate complex **1** (Table 3, entry 9).

**Fig. S16** GPC traces for PVCHC polyol produced by using di-nickel acetate complex **1** (Table 3, entry 10).

**Fig. S17** GPC traces for PCPC polyol produced by using di-nickel acetate complex **1** (Table 3, entry 11).

**Table S1** Selected bond lengths and angles of nickel complexes **1-5** and **A**<sup>46</sup>

**Table S2** Temperature effects of  $\text{CO}_2$ -CHO copolymerization catalyzed by using di-Ni complex **1**

**Table S3** Kinetic studies of CO<sub>2</sub>-CHO copolymerization catalyzed by using di-Ni complex **1** at various temperatures (100, 110, 120, 125, 130, 135 °C)<sup>a</sup>

**Table S4** Kinetic parameters for CO<sub>2</sub>-CHO copolymerization catalyzed by using di-Ni complex **1**

**Table S5** Crystallographic data of complexes **1-5**

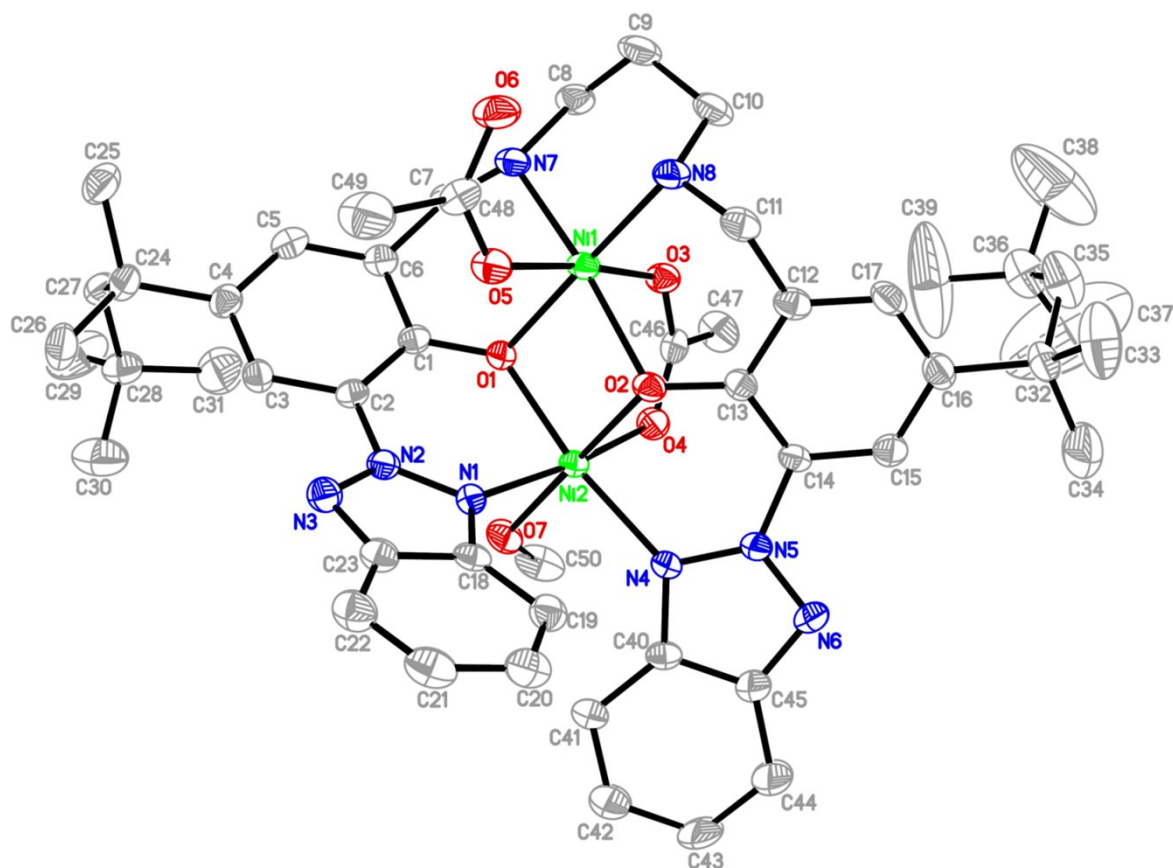

**Fig. S1** ORTEP drawing of complex **2** with probability ellipsoids drawn at 50% level. Hydrogen atoms are omitted for clarity. Selected bond lengths/Å and angles/deg: Ni(1)-O(1) 2.008(3), Ni(1)-O(2) 2.128(3), Ni(1)-O(3) 2.054(3), Ni(1)-O(5) 2.067(3), Ni(1)-N(7) 2.106(4), Ni(1)-N(8) 2.030(4), Ni(2)-O(1) 1.970(3), Ni(2)-O(2) 2.047(3), Ni(2)-O(4) 2.037(3), Ni(2)-O(7) 2.090(3), Ni(2)-N(1) 2.113(3), Ni(2)-N(4) 2.040(3), O(1)-Ni(1)-N(8) 178.39(13), O(1)-Ni(1)-O(3) 86.99(11), N(8)-Ni(1)-O(3) 93.55(13), O(1)-Ni(1)-O(5) 87.66(12), N(8)-Ni(1)-O(5) 91.73(14), O(3)-Ni(1)-O(5) 174.17(12), O(1)-Ni(1)-N(7) 88.78(12), N(8)-Ni(1)-N(7) 92.74(14), O(3)-Ni(1)-N(7) 89.15(12), O(5)-Ni(1)-N(7) 93.05(13), O(1)-Ni(1)-O(2) 83.99(11), N(8)-Ni(1)-O(2) 94.51(13), O(3)-Ni(1)-O(2) 88.19(11), O(5)-Ni(1)-O(2) 88.94(11), N(7)-Ni(1)-O(2) 172.42(12), O(1)-Ni(2)-O(4) 88.05(11), O(1)-Ni(2)-N(4) 171.49(12), O(4)-Ni(2)-N(4) 86.91(13), O(1)-Ni(2)-O(2) 87.12(11), O(4)-Ni(2)-O(2) 90.71(11), N(4)-Ni(2)-O(2) 86.10(12), O(1)-Ni(2)-O(7) 93.02(12), O(4)-Ni(2)-O(7) 87.48(13), N(4)-Ni(2)-O(7) 93.60(13), O(2)-Ni(2)-O(7) 178.17(12), O(1)-Ni(2)-N(1) 85.23(12), O(4)-Ni(2)-N(1) 172.11(12), N(4)-Ni(2)-N(1) 100.25(13), O(2)-Ni(2)-N(1) 93.07(12), O(7)-Ni(2)-N(1) 88.76(13).

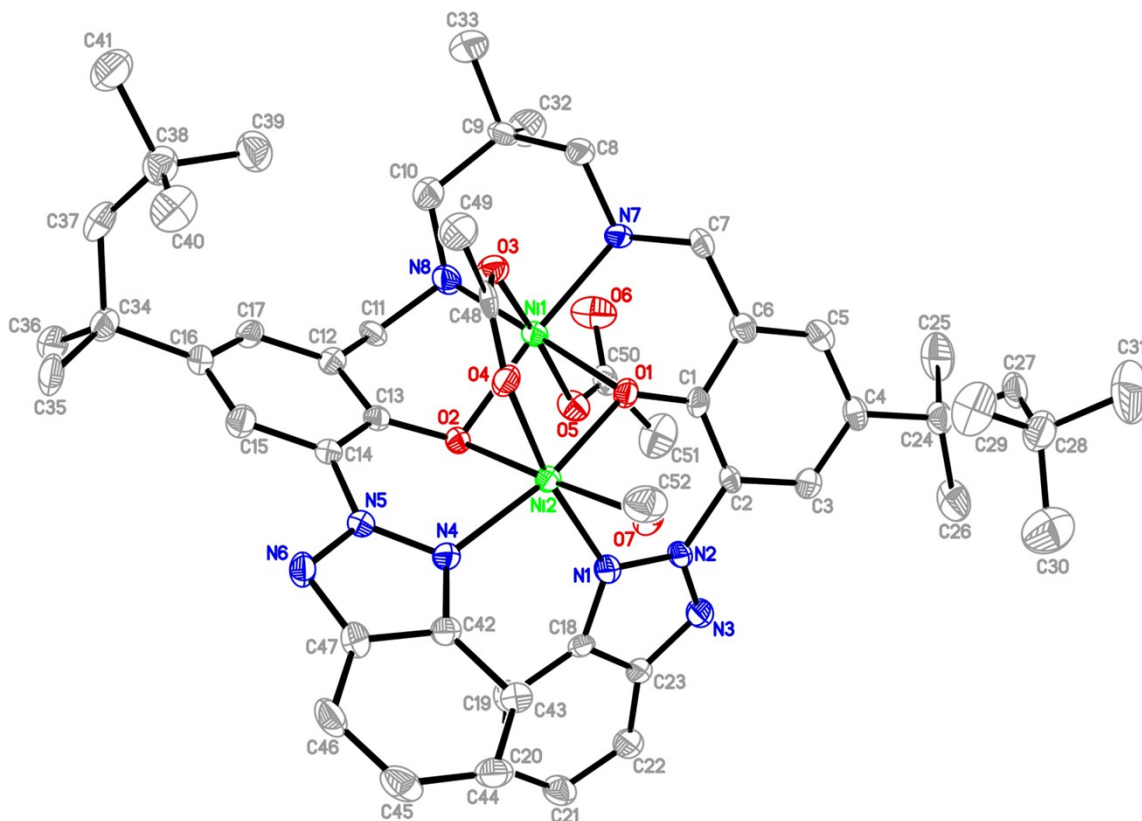

**Fig. S2** ORTEP drawing of complex **3** with probability ellipsoids drawn at 50% level. Hydrogen atoms are omitted for clarity. Ni(1)-O(1) 2.009(2), Ni(1)-O(2) 2.130(3), Ni(1)-O(3) 2.069(3), Ni(1)-O(5) 2.083(3), Ni(1)-N(7) 2.096(3), Ni(1)-N(8) 2.029(3), Ni(2)-O(1) 1.974(3), Ni(2)-O(2) 2.066(2), Ni(2)-O(4) 2.045(3), Ni(2)-O(7) 2.116(3), Ni(2)-N(1) 2.124(3), Ni(2)-N(4) 2.045(3), O(1)-Ni(1)-N(8) 178.59(13), O(1)-Ni(1)-O(3) 88.29(10), N(8)-Ni(1)-O(3) 92.90(13), O(1)-Ni(1)-O(5) 87.13(11), N(8)-Ni(1)-O(5) 91.62(13), O(3)-Ni(1)-O(5) 173.29(11), O(1)-Ni(1)-N(7) 89.75(11), N(8)-Ni(1)-N(7) 91.01(13), O(3)-Ni(1)-N(7) 90.30(12), O(5)-Ni(1)-N(7) 94.58(12), O(1)-Ni(1)-O(2) 83.58(10), N(8)-Ni(1)-O(2) 95.69(11), O(3)-Ni(1)-O(2) 88.05(10), O(5)-Ni(1)-O(2) 86.57(10), N(7)-Ni(1)-O(2) 173.17(11), O(1)-Ni(2)-O(4) 88.95(11), O(1)-Ni(2)-N(4) 169.96(12), O(4)-Ni(2)-N(4) 85.66(12), O(1)-Ni(2)-O(2) 86.13(10), O(4)-Ni(2)-O(2) 91.23(10), N(4)-Ni(2)-O(2) 85.53(11), O(1)-Ni(2)-O(7) 92.26(10), O(4)-Ni(2)-O(7) 87.34(10), N(4)-Ni(2)-O(7) 95.93(11), O(2)-Ni(2)-O(7) 177.87(11), O(1)-Ni(2)-N(1) 85.38(11), O(4)-Ni(2)-N(1) 171.61(11), N(4)-Ni(2)-N(1) 100.85(12), O(2)-Ni(2)-N(1) 94.54(11), O(7)-Ni(2)-N(1) 86.72(11).

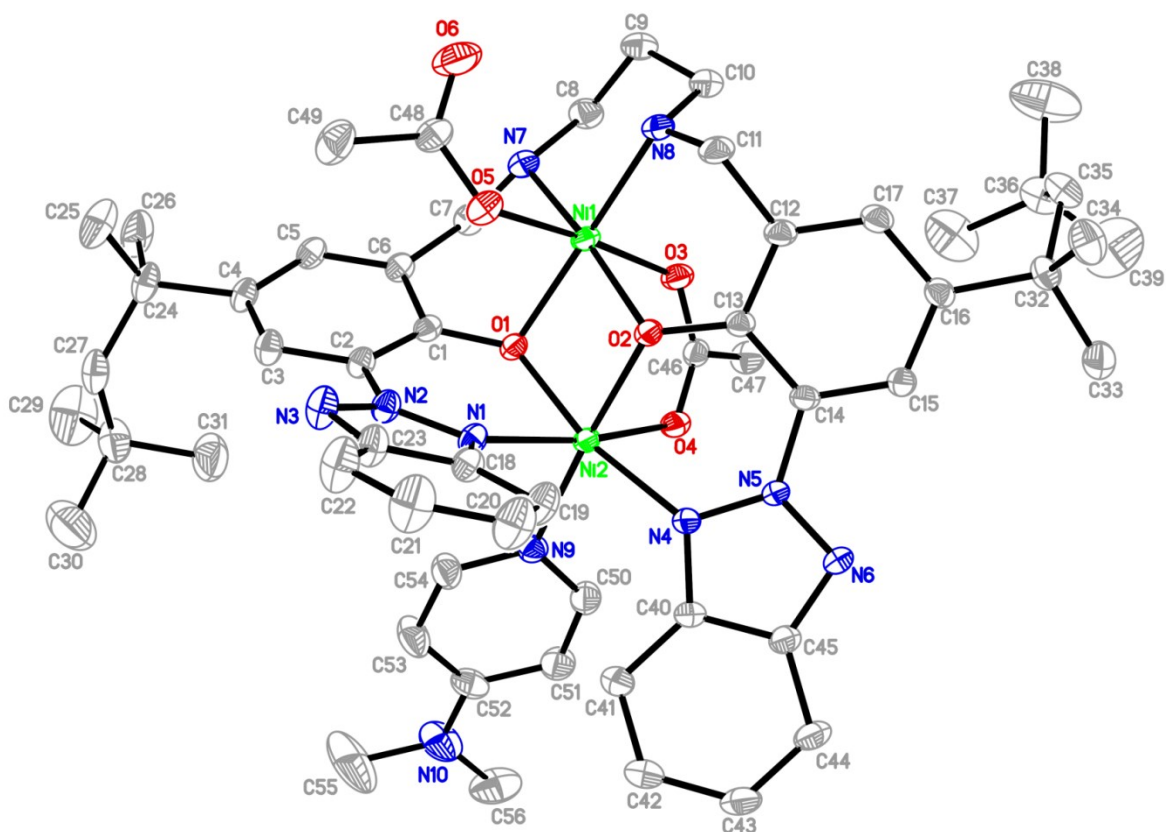

**Fig. S3** ORTEP drawing of complex **4** with probability ellipsoids drawn at 60% level. Hydrogen atoms are omitted for clarity. Selected bond lengths/Å and angles/deg: Ni(1)-O(1) 2.0189(10), Ni(1)-O(2) 2.1031(10), Ni(1)-O(3) 2.0666(10), Ni(1)-O(5) 2.0942(11), Ni(1)-N(7) 2.1027(12), Ni(1)-N(8) 2.0281(12), Ni(2)-O(1) 1.9825(10), Ni(2)-O(2) 2.0557(9), Ni(2)-O(4) 2.0835(10), Ni(2)-N(1) 2.1606(11), Ni(2)-N(4) 2.0669(12), Ni(2)-N(9) 2.1084(11), O(1)-Ni(1)-N(8) 177.42(5), O(1)-Ni(1)-O(3) 87.33(4), N(8)-Ni(1)-O(3) 94.86(5), O(1)-Ni(1)-O(5) 89.36(4), N(8)-Ni(1)-O(5) 88.40(5), O(3)-Ni(1)-O(5) 175.78(4), O(1)-Ni(1)-N(7) 89.93(4), N(8)-Ni(1)-N(7) 91.49(5), O(3)-Ni(1)-N(7) 88.47(4), O(5)-Ni(1)-N(7) 94.13(4), O(1)-Ni(1)-O(2) 83.76(4), N(8)-Ni(1)-O(2) 94.94(5), O(3)-Ni(1)-O(2) 87.94(4), O(5)-Ni(1)-O(2) 89.11(4), N(7)-Ni(1)-O(2) 172.88(4), O(1)-Ni(2)-O(2) 85.92(4), O(1)-Ni(2)-N(4) 168.21(4), O(2)-Ni(2)-N(4) 83.91(4), O(1)-Ni(2)-O(4) 86.76(4), O(2)-Ni(2)-O(4) 90.42(4), N(4)-Ni(2)-O(4) 87.36(4), O(1)-Ni(2)-N(9) 96.55(4), O(2)-Ni(2)-N(9) 176.93(4), N(4)-Ni(2)-N(9) 93.43(5), O(4)-Ni(2)-N(9) 87.90(4), O(1)-Ni(2)-N(1) 82.82(4), O(2)-Ni(2)-N(1) 89.28(4), N(4)-Ni(2)-N(1) 102.97(4), O(4)-Ni(2)-N(1) 169.58(4), N(9)-Ni(2)-N(1) 92.83(5).

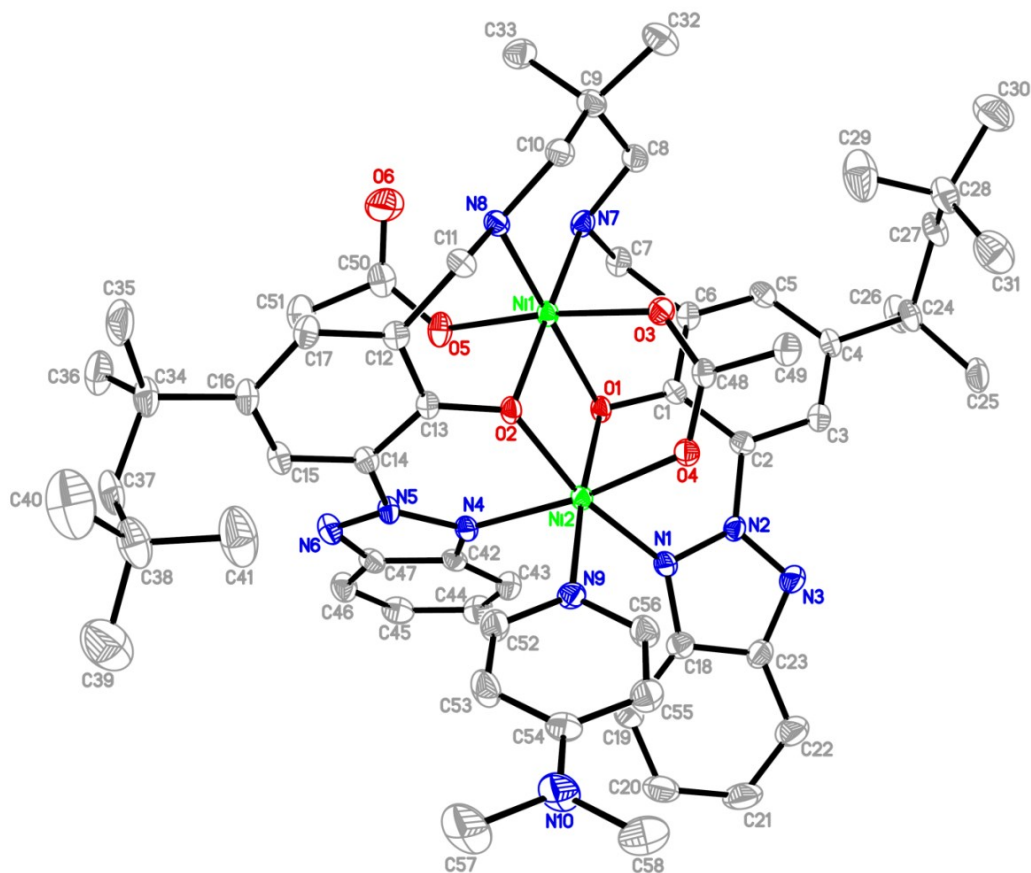

**Fig. S4** ORTEP drawing of complex **5** with probability ellipsoids drawn at 50% level. Hydrogen atoms are omitted for clarity. Selected bond lengths/Å and angles/deg: Ni(1)-O(1) 2.111(2), Ni(1)-O(2) 2.019(2), Ni(1)-O(3) 2.072(2), Ni(1)-O(5) 2.081(2), Ni(1)-N(7) 2.029(3), Ni(1)-N(8) 2.089(3), Ni(2)-O(1) 2.063(2), Ni(2)-O(2) 1.983(2), Ni(2)-O(4) 2.068(2), Ni(2)-N(1) 2.064(3), Ni(2)-N(4) 2.143(3), Ni(2)-N(9) 2.096(3), O(2)-Ni(1)-N(7) 178.95(10), O(2)-Ni(1)-O(3) 86.50(9), N(7)-Ni(1)-O(3) 93.73(10), O(2)-Ni(1)-O(5) 89.29(9), N(7)-Ni(1)-O(5) 90.40(10), O(3)-Ni(1)-O(5) 174.07(9), O(2)-Ni(1)-N(8) 90.04(10), N(7)-Ni(1)-N(8) 90.99(11), O(3)-Ni(1)-N(8) 88.65(10), O(5)-Ni(1)-N(8) 95.53(10), O(2)-Ni(1)-O(1) 83.77(9), N(7)-Ni(1)-O(1) 95.23(10), O(3)-Ni(1)-O(1) 86.25(9), O(5)-Ni(1)-O(1) 89.15(9), N(8)-Ni(1)-O(1) 172.20(10), O(2)-Ni(2)-O(1) 85.93(9), O(2)-Ni(2)-N(1) 168.09(10), O(1)-Ni(2)-N(1) 83.82(10), O(2)-Ni(2)-O(4) 87.74(9), O(1)-Ni(2)-O(4) 89.77(9), N(1)-Ni(2)-O(4) 86.18(10), O(2)-Ni(2)-N(9) 96.86(10), O(1)-Ni(2)-N(9) 175.43(10), N(1)-Ni(2)-N(9) 93.00(11), O(4)-Ni(2)-N(9) 86.72(10), O(2)-Ni(2)-N(4) 83.15(10), O(1)-Ni(2)-N(4) 89.97(9), N(1)-Ni(2)-N(4) 102.85(11), O(4)-Ni(2)-N(4) 170.88(10), N(9)-Ni(2)-N(4) 93.96(11).

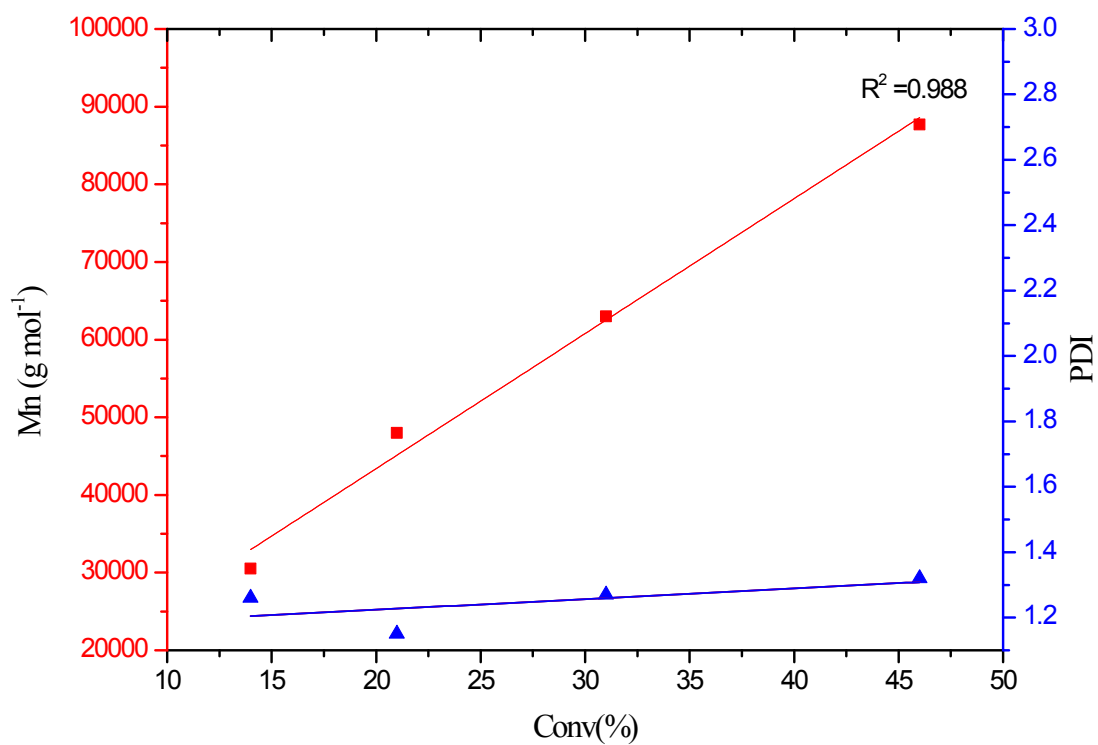

**Fig. S5** Plot of  $M_n$  (■) and PDI (▲) (determined from GPC analysis) vs CHO conversion for the copolymerization of CHO and CO<sub>2</sub> using di-nickel acetate complex **1** as the catalyst ( $[\text{CHO}]_0/[\mathbf{1}]_0 = 10000$ ) at 120 °C and 20.7 bar CO<sub>2</sub>.



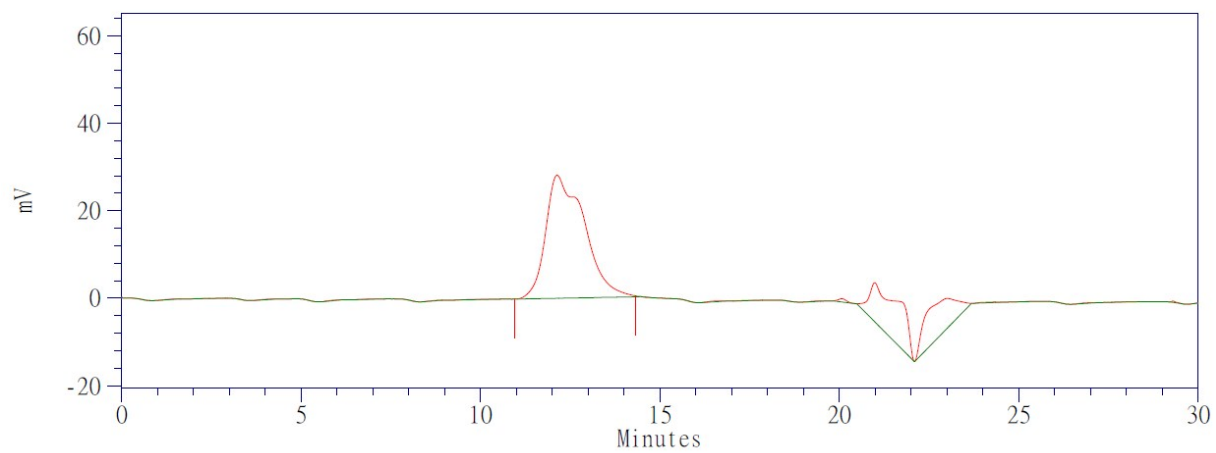

**Fig. S6** GPC traces for the afforded PCHC with a bimodal molecular weight distribution catalyzed by di-nickel complex **1** (Table 1, entry 10).

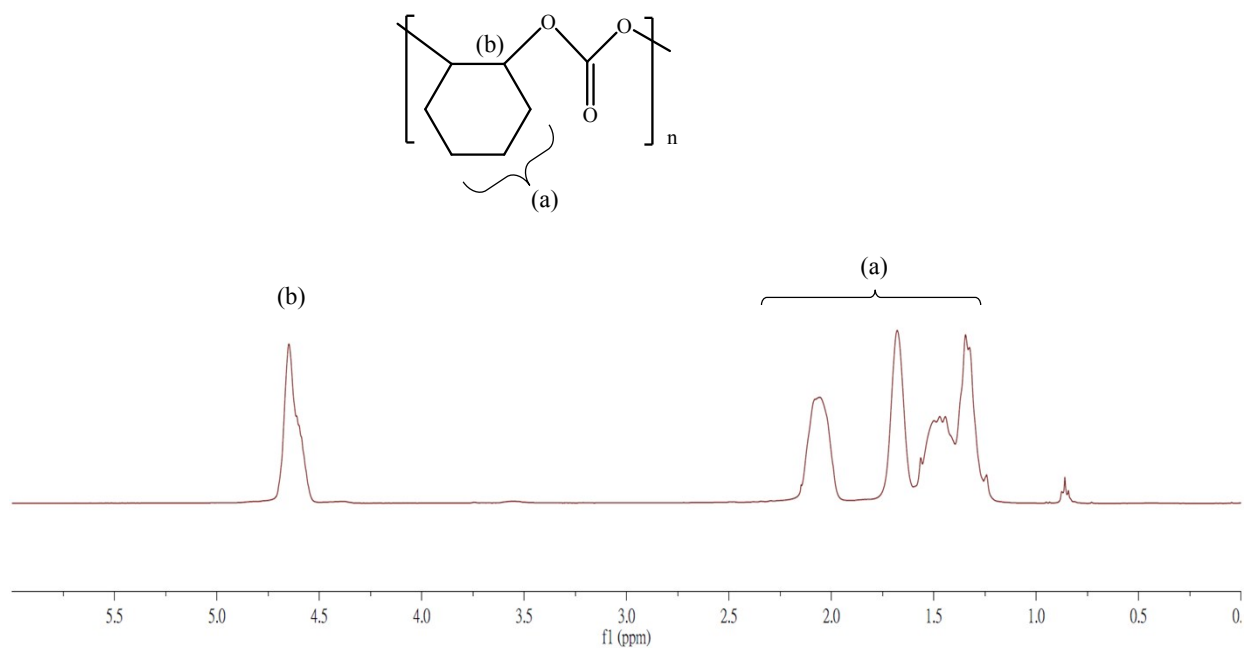

**Fig. S7** <sup>1</sup>H NMR spectrum of the purified PCHC produced at 1 atm of CO<sub>2</sub> pressure by using di-nickel acetate complex **1** (Table 2, entry 1) in CDCl<sub>3</sub>. Peak at δ 4.65 ppm is assigned to the methine protons in PCHC, and no significant signals at 3.2-3.5 ppm confirms >99% carbonate linkages in PCHC.

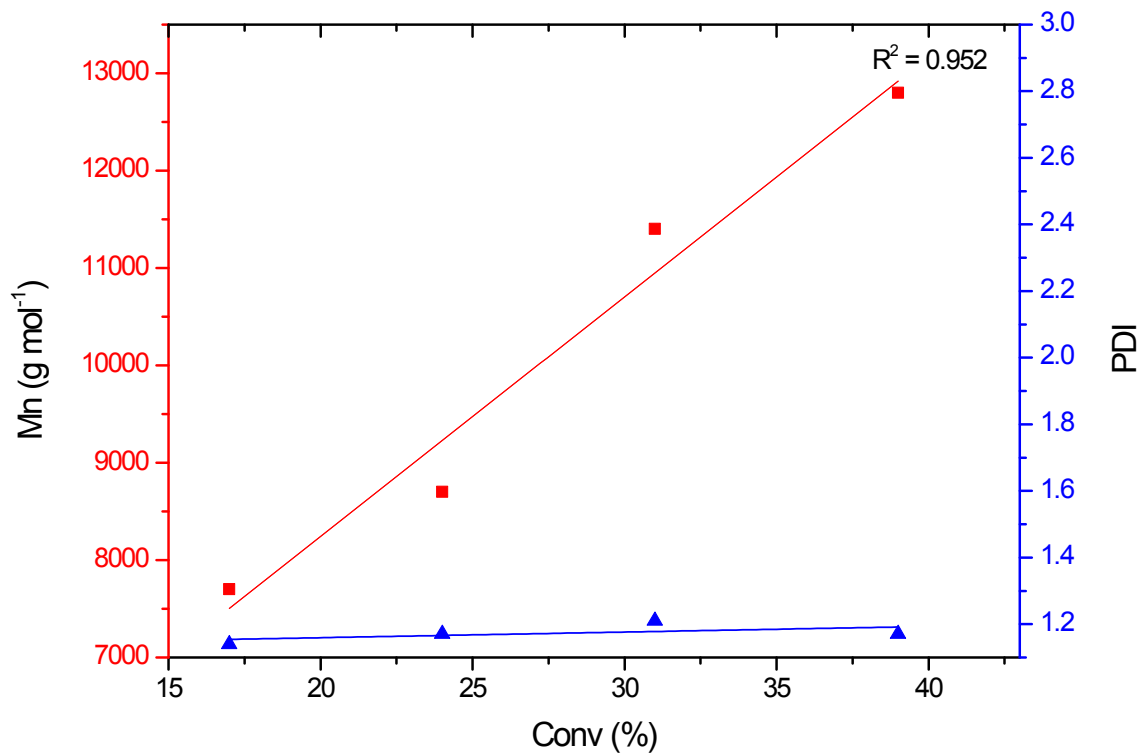

**Fig. S8** Plot of  $M_n$  (■) and PDI (▲) (determined from GPC analysis) vs CHO conversion for the copolymerization of CHO and CO<sub>2</sub> using di-Ni complex **1** as the catalyst ( $[\text{CHO}]_0/[\mathbf{1}]_0 = 1600$ ) at 80 °C and 1 atm of CO<sub>2</sub> pressure.

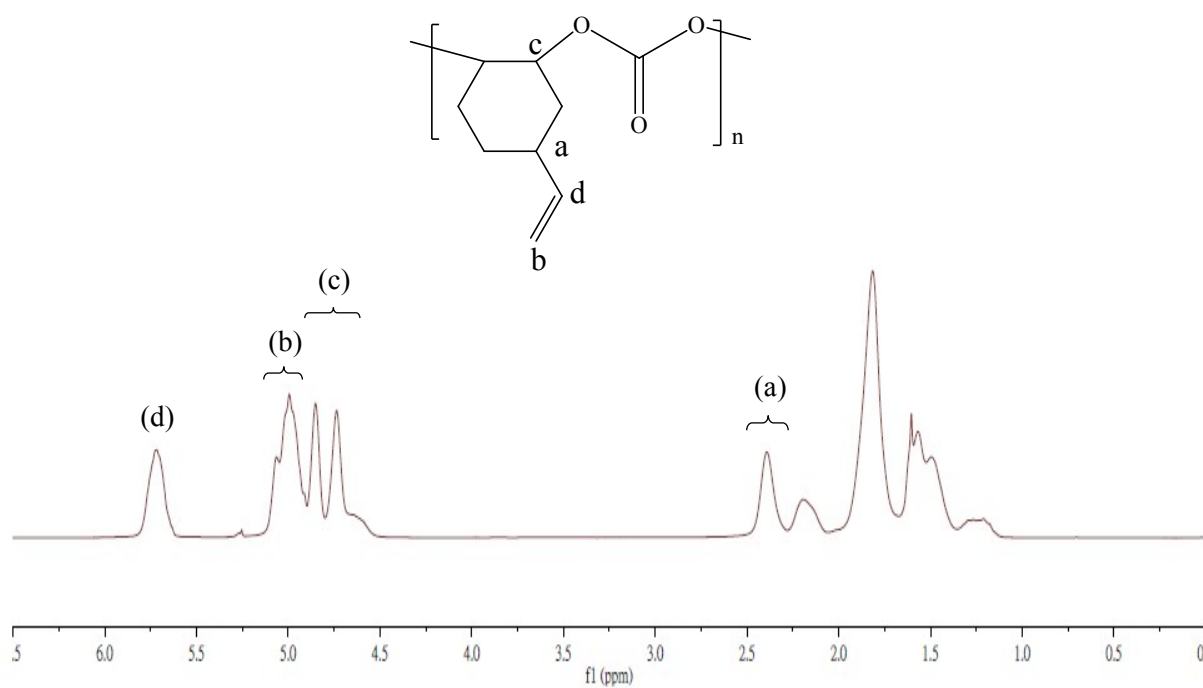

**Fig. S9** <sup>1</sup>H NMR spectrum of the purified PVCHC produced by using di-nickel acetate complex **1** (Table 3, entry 2) in CDCl<sub>3</sub>. No significant signal at 3.2-3.5 ppm confirm >99% carbonate linkages in PVCHC.

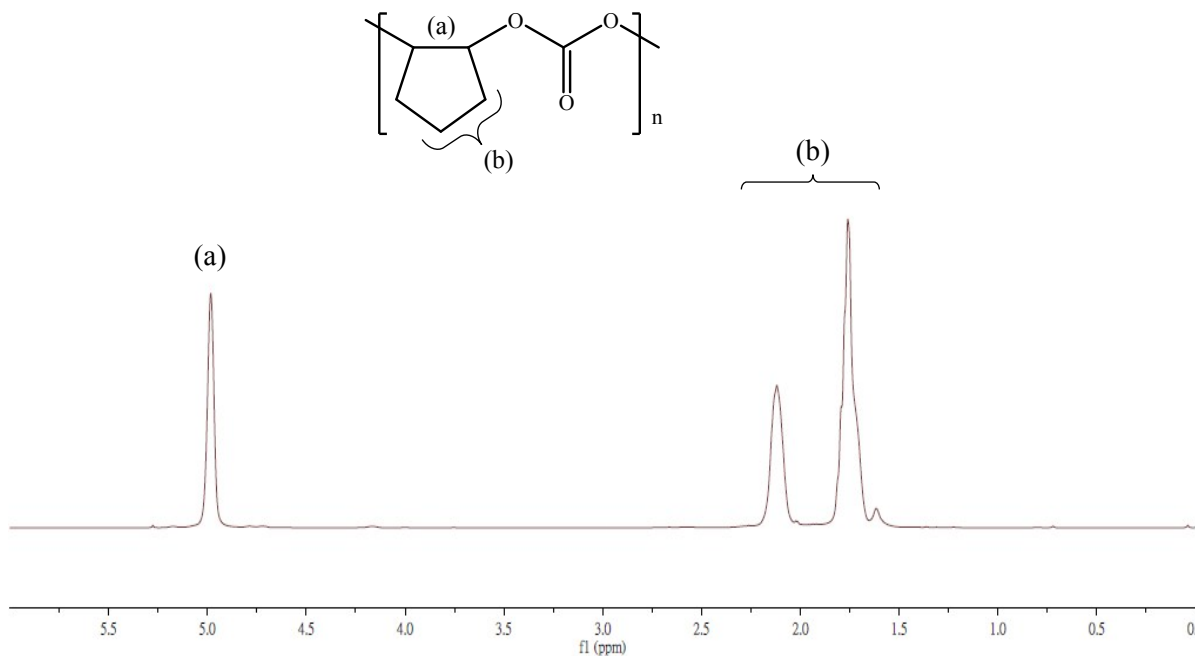

**Fig. S10** <sup>1</sup>H NMR spectrum of the purified PCPC afforded by using di-nickel acetate complex **1** (Table 3, entry 5) in CDCl<sub>3</sub>. Peak at  $\delta = 4.9$  ppm is assigned to the methine protons in PCPC, and no obvious signal at 3.6–4.0 ppm confirms >99% carbonate linkages in PCPC.

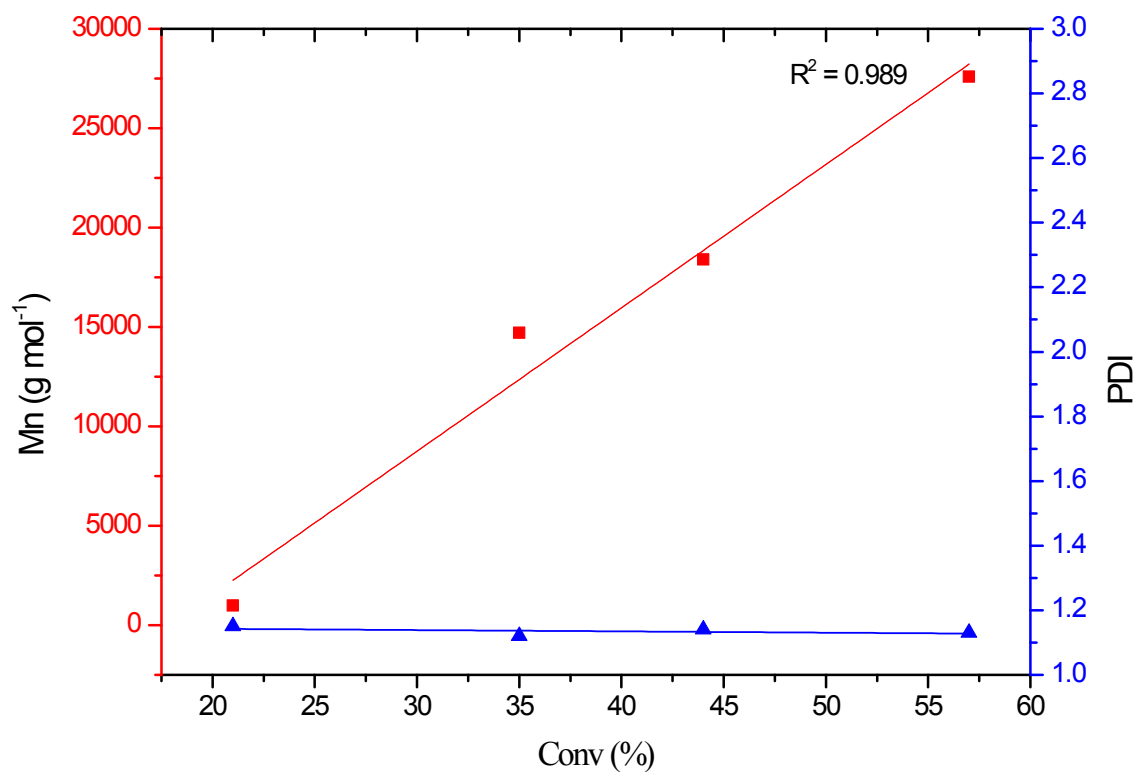

**Fig. S11** Plot of  $M_n$  (■) and PDI (▲) (determined from GPC analysis) vs CPO conversion for the copolymerization of cyclopentene oxide and CO<sub>2</sub> using di-nickel acetate complex **1** as the catalyst ( $[\text{CHO}]_0/[\mathbf{1}]_0 = 1600$ ) at 120 °C and 20.7 bar CO<sub>2</sub>.

(a)

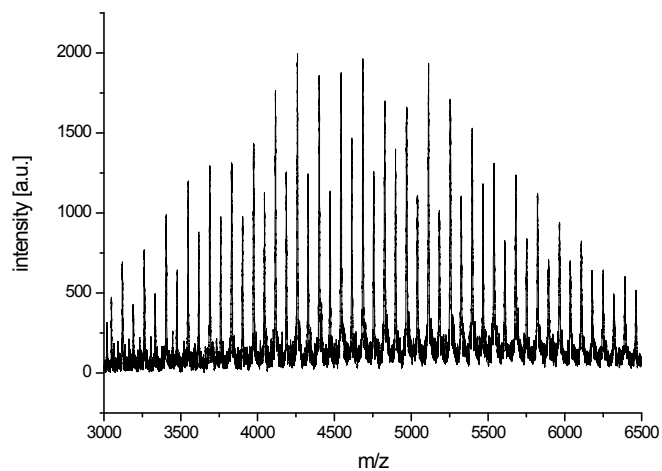

(b)

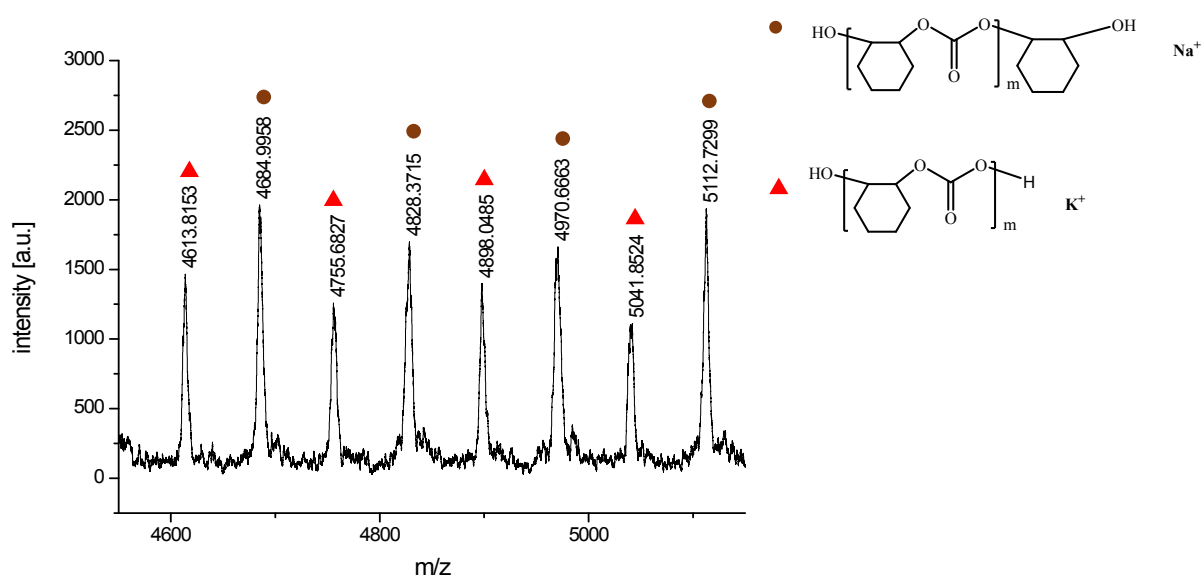

**Fig. S12** The MALDI-TOF spectrum of the obtained PCHC polyol catalyzed by di-Ni complex **1** with the addition of water as a chain transfer agent (Table 3, entry 8).

(a)

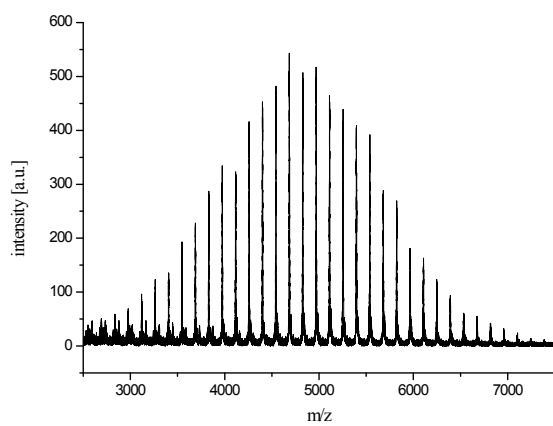

(b)

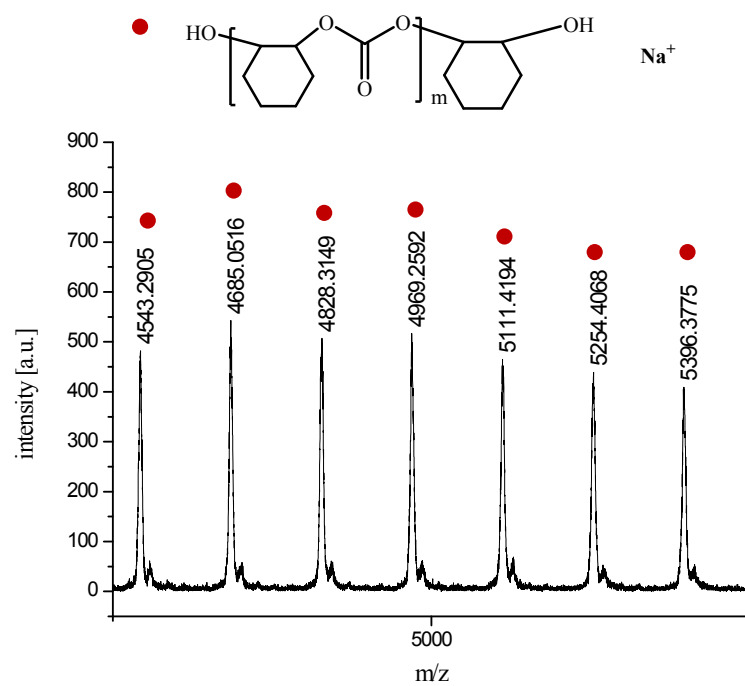

**Fig. S13** The MALDI-TOF spectrum of the obtained PCHC polyol catalyzed by di-Ni complex **1** (Table 3, entry 9).



(a)

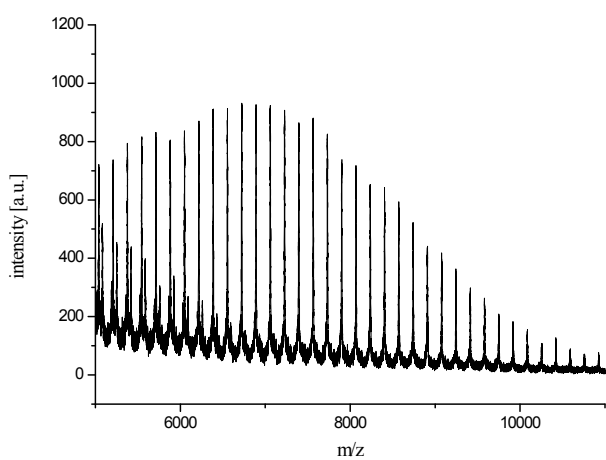

(b)

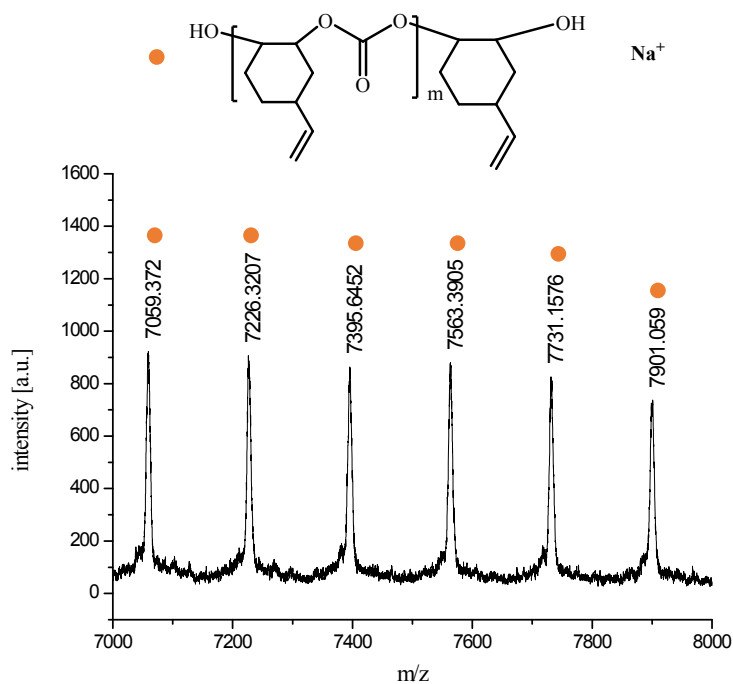

**Fig. S14** The MALDI-TOF spectrum of the obtained PVCHC polyol catalyzed by di-Ni complex **1** (Table 3, entry 10).

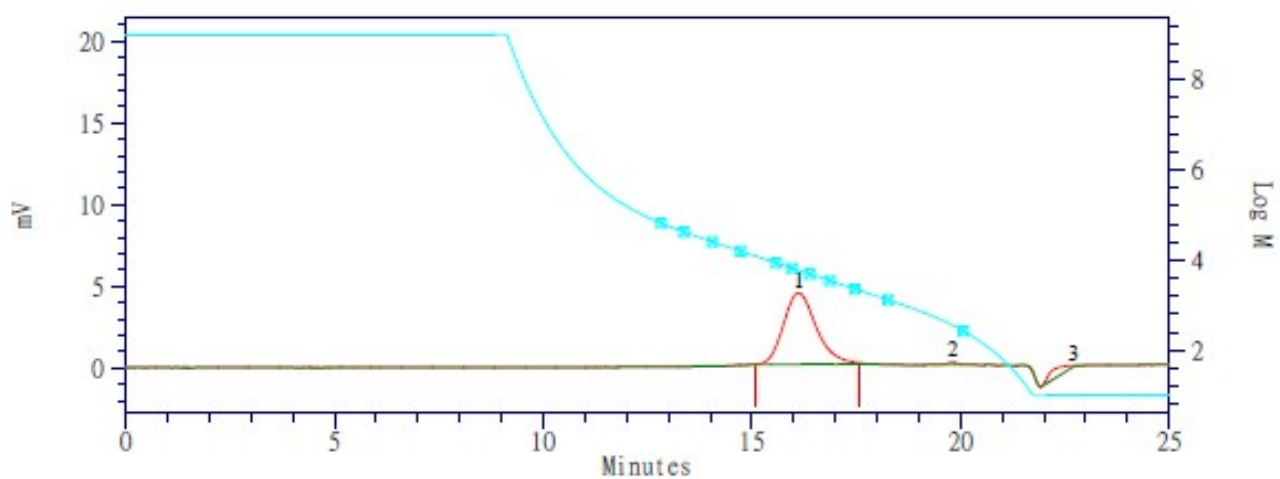

**Fig. S15** GPC traces for PCHC polyol produced by using di-nickel acetate complex **1** (Table 3, entry 9).

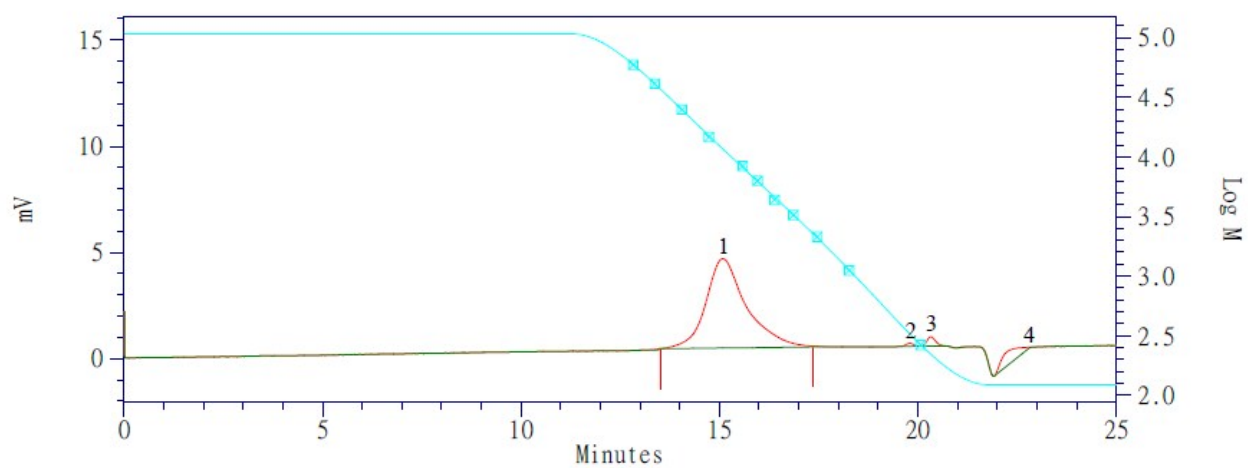

**Fig. S16** GPC traces for PVCHC polyol produced by using di-nickel acetate complex **1** (Table 3, entry 10).

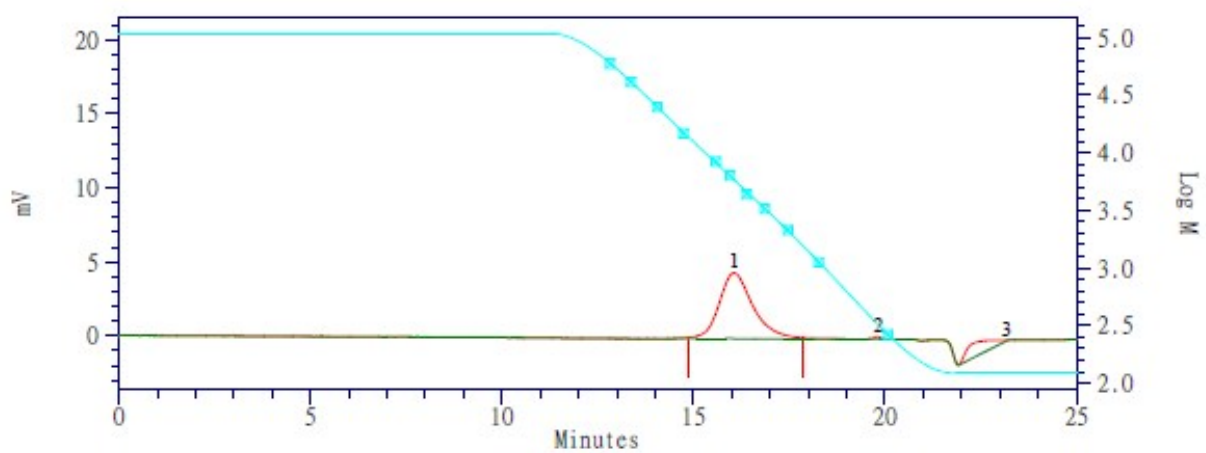

**Fig. S17** GPC traces for PCPC polyol produced by using di-nickel acetate complex **1** (Table 3, entry 11).

**Table S1** Selected bond lengths and angles of nickel complexes **1-5** and **A**<sup>46</sup>

|                 | <b>1</b>   | <b>2</b>   | <b>3</b>   | <b>4</b>   | <b>5</b>   | <b>A</b>   |
|-----------------|------------|------------|------------|------------|------------|------------|
| Ni(1)-O(1)      | 2.028(3)   | 2.008(3)   | 2.009(2)   | 2.0189(10) | 2.111(2)   | 2.0300(17) |
| Ni(1)-O(2)      | 2.100(3)   | 2.128(3)   | 2.9797(7)  | 2.1031(10) | 2.019(2)   | 2.0412(17) |
| Ni(1)-O(3)      | 2.060(3)   | 2.054(3)   | 2.069(3)   | 2.0666(10) | 2.072(2)   | 2.1142(19) |
| Ni(1)-O(7)      | 2.094(3)   | -          | -          | -          | -          | -          |
| Ni(1)-O(5)      | -          | 2.067(3)   | 2.083(3)   | 2.0942(11) | 2.081(2)   | -          |
| Ni(1)-N(7)      | 2.126(4)   | 2.106(4)   | 2.096(3)   | 2.1027(12) | 2.029(3)   | 2.074(2)   |
| Ni(1)-N(8)      | 2.128(4)   | 2.030(4)   | 2.029(3)   | 2.0281(12) | 2.089(3)   | 2.100(2)   |
| Ni(2)-O(1)      | 1.987(3)   | 1.970(3)   | 1.974(3)   | 1.9825(10) | 2.063(2)   | 2.0606(17) |
| Ni(2)-O(2)      | 2.047(3)   | 2.047(3)   | 2.066(2)   | 2.0557(9)  | 1.983(2)   | 1.9995(17) |
| Ni(2)-O(4)      | 2.106(3)   | 2.037(3)   | 2.045(3)   | 2.0835(10) | 2.068(2)   | -          |
| Ni(2)-O(5)      | 2.044(3)   | -          | -          | -          | -          | 2.0283(18) |
| Ni(2)-N(9)      | -          | -          | -          | 2.1084(11) | 2.096(3)   | -          |
| Ni(2)-O(7)      | -          | 2.090(3)   | 2.116(3)   | -          | -          | 2.0731(19) |
| Ni(2)-N(1)      | 2.089(4)   | 2.113(3)   | 2.124(3)   | 2.1606(11) | 2.064(3)   | 2.066(2)   |
| Ni(2)-N(4)      | 2.041(3)   | 2.040(3)   | 2.045(3)   | 2.0669(12) | 2.143(3)   | 2.213(2)   |
| O(1)-Ni(1)-O(2) | 82.26(11)  | 83.99(11)  | 83.58(10)  | 83.76(4)   | 83.77(9)   | 78.92(7)   |
| O(3)-Ni(1)-O(5) | -          | 174.17(12) | 173.29(11) | 175.78(4)  | 174.07(9)  | -          |
| O(3)-Ni(1)-O(7) | 174.95(13) | -          | -          | -          | -          | -          |
| N(7)-Ni(1)-N(8) | 99.22(13)  | 92.74(14)  | 91.01(13)  | 91.49(5)   | 90.99(11)  | 86.08(8)   |
| O(1)-Ni(1)-N(8) | 169.82(13) | 178.39(13) | 178.59(13) | 177.42(5)  | 172.20(10) | 168.38(8)  |
| O(2)-Ni(1)-N(7) | 164.46(12) | 172.42(12) | 173.17(11) | 172.88(4)  | 178.95(10) | 105.03(8)  |
| N(1)-Ni(2)-N(4) | 102.44(14) | 100.25(13) | 100.85(12) | 102.97(4)  | 92.37(7)   | 100.49(8)  |
| O(4)-Ni(2)-O(7) | -          | 87.48(13)  | 87.34(10)  |            |            | -          |
| O(4)-Ni(2)-N(9) | -          | -          | -          | 87.90(4)   | 86.72(10)  | -          |
| O(4)-Ni(2)-O(5) | 171.14(12) | -          | -          | -          | -          | -          |
| O(1)-Ni(2)-O(2) | 84.61(11)  | 87.12(11)  | 86.13(10)  | 85.92(4)   | 85.93(9)   | 79.17(7)   |
| O(2)-Ni(2)-N(1) | 166.66(13) | 93.07(12)  | 94.54(11)  | 89.28(4)   | 168.09(10) | 163.28(8)  |
| O(1)-Ni(2)-N(4) | 169.57(13) | 171.49(12) | 169.96(12) | 168.21(4)  | 170.88(10) | 102.86(7)  |

**Table S2** Temperature effects of CO<sub>2</sub>-CHO copolymerization catalyzed by using di-Ni complex **1**

| Entry           | Temp (°C) | Time /h | % CHO Conv. <sup>a</sup> | % Copolymer <sup>a</sup> (% carbonate) <sup>b</sup> | TON <sup>c</sup> | TOF /h <sup>-1d</sup> | M <sub>n</sub> (PDI) <sup>e</sup> |
|-----------------|-----------|---------|--------------------------|-----------------------------------------------------|------------------|-----------------------|-----------------------------------|
| S1              | 60        | 4       | 13                       | >99(>99)                                            | 650              | 163                   | 17300(1.22)                       |
| S2              | 50        | 8       | 12                       | >99(>99)                                            | 600              | 75                    | 18500(1.22)                       |
| S3              | 25        | 72      | 9                        | >99(>99)                                            | 450              | 6                     | 11100(1.17)                       |
| S4 <sup>f</sup> | 25        | 72      | 25                       | >99(>99)                                            | 400              | 6                     | 12000(1.20)                       |

Copolymerization conditions:  $3.125 \times 10^{-2}$  mmol catalyst,  $[\text{CHO}]_0/[\mathbf{1}]_0 = 5000$ ,  $p\text{CO}_2^0 = 20.7$  bar. <sup>a</sup>Based on <sup>1</sup>H NMR analysis of the reaction mixture.<sup>43,44</sup> <sup>b</sup>Based on <sup>1</sup>H NMR determination of the purified copolymers.<sup>43,44</sup> <sup>c</sup>TON = number of moles of CHO consumed per mole of catalyst. <sup>d</sup>TOF = TON per hour. <sup>e</sup>Determined by GPC in THF, calibrated using polystyrene standards. <sup>f</sup> $[\text{CHO}]_0/[\mathbf{1}]_0 = 1600$ .

**Table S3** Kinetic studies of CO<sub>2</sub>-CHO copolymerization catalyzed by using di-Ni complex **1** at various temperatures (100, 110, 120, 125, 130, 135 °C)<sup>a</sup>

| Entry | Temp (°C) | Time/min | % CHO Conv. <sup>b</sup> | ln([CHO] <sub>0</sub> /[CHO] <sub>t</sub> ) |
|-------|-----------|----------|--------------------------|---------------------------------------------|
| S1    | 100       | 60       | 5                        | 0.0513                                      |
| S2    | 100       | 120      | 16                       | 0.1744                                      |
| S3    | 100       | 180      | 30                       | 0.3567                                      |
| S4    | 100       | 240      | 46                       | 0.6162                                      |
| S5    | 110       | 30       | 22                       | 0.2485                                      |
| S6    | 110       | 60       | 32                       | 0.3857                                      |
| S7    | 110       | 90       | 42                       | 0.5447                                      |
| S8    | 110       | 120      | 50                       | 0.6931                                      |
| S9    | 120       | 20       | 14                       | 0.1508                                      |
| S10   | 120       | 30       | 21                       | 0.2357                                      |
| S11   | 120       | 45       | 31                       | 0.3711                                      |
| S12   | 120       | 60       | 36                       | 0.4463                                      |
| S13   | 125       | 20       | 12                       | 0.1278                                      |
| S14   | 125       | 30       | 23                       | 0.2614                                      |
| S15   | 125       | 45       | 33                       | 0.4005                                      |
| S16   | 125       | 60       | 43                       | 0.5621                                      |
| S17   | 130       | 20       | 14                       | 0.1508                                      |
| S18   | 130       | 30       | 24                       | 0.2744                                      |
| S19   | 130       | 45       | 37                       | 0.4620                                      |
| S20   | 130       | 60       | 49                       | 0.6733                                      |
| S21   | 135       | 20       | 15                       | 0.1625                                      |
| S22   | 135       | 30       | 30                       | 0.3567                                      |
| S23   | 135       | 45       | 44                       | 0.5798                                      |
| S24   | 135       | 60       | 57                       | 0.8440                                      |

Copolymerization conditions: 3.125 x 10<sup>-2</sup> mmol catalyst, [CHO]<sub>0</sub>/[**1**]<sub>0</sub> = 10000, pCO<sub>2</sub><sup>0</sup> = 20.7 bar. <sup>a</sup>All runs showed excellent copolymerization selectivity (>99% PCHC, >99% carbonate linkages) based on <sup>1</sup>H NMR determination. <sup>b</sup>Based on <sup>1</sup>H NMR analysis of the reaction mixture.<sup>43,44</sup>

**Table S4** Kinetic parameters for CO<sub>2</sub>-CHO copolymerization catalyzed by using di-Ni complex **1**

| Entry | Temp (°C) | Observed rate coefficient, $k_{\text{obs}}$ (h <sup>-1</sup> ) <sup>a</sup> | ln( $k_{\text{obs}}$ ) | Temp (K) | Temp <sup>-1</sup> , 1/T (K <sup>-1</sup> ) |
|-------|-----------|-----------------------------------------------------------------------------|------------------------|----------|---------------------------------------------|
| S1    | 100       | 0.1877                                                                      | -1.6729                | 373.15   | 0.00268                                     |
| S2    | 110       | 0.2986                                                                      | -1.2087                | 383.15   | 0.00261                                     |
| S3    | 120       | 0.4497                                                                      | -0.7992                | 393.15   | 0.00254                                     |
| S4    | 125       | 0.6352                                                                      | -0.4538                | 398.15   | 0.00251                                     |
| S5    | 130       | 0.7783                                                                      | -0.2506                | 403.15   | 0.00248                                     |
| S6    | 135       | 1.0011                                                                      | 0.0011                 | 408.15   | 0.00245                                     |

<sup>a</sup>Calculated from the slope of the fitted regression line of Fig. 4.



**Table S5** Crystallographic data of complexes **1-5**

|                                                    | <b>1·MeOH</b>                                                                 | <b>2·MeOH</b>                                                                 | <b>3·3MeOH</b>                                                                 | <b>4·C<sub>6</sub>H<sub>14</sub>·H<sub>2</sub>O</b>                            | <b>5·C<sub>6</sub>H<sub>14</sub>·CH<sub>2</sub>Cl<sub>2</sub></b>                              |
|----------------------------------------------------|-------------------------------------------------------------------------------|-------------------------------------------------------------------------------|--------------------------------------------------------------------------------|--------------------------------------------------------------------------------|------------------------------------------------------------------------------------------------|
| formula                                            | C <sub>52</sub> H <sub>76</sub> N <sub>8</sub> Ni <sub>2</sub> O <sub>8</sub> | C <sub>51</sub> H <sub>72</sub> N <sub>8</sub> Ni <sub>2</sub> O <sub>8</sub> | C <sub>55</sub> H <sub>84</sub> N <sub>8</sub> Ni <sub>2</sub> O <sub>10</sub> | C <sub>62</sub> H <sub>90</sub> N <sub>10</sub> Ni <sub>2</sub> O <sub>7</sub> | C <sub>65</sub> H <sub>94</sub> Cl <sub>2</sub> N <sub>10</sub> Ni <sub>2</sub> O <sub>6</sub> |
| Formula weight                                     | 1058.62                                                                       | 1042.59                                                                       | 1134.72                                                                        | 1204.83                                                                        | 1296.54                                                                                        |
| Temp (K)                                           | 150(2)                                                                        | 150(2)                                                                        | 150(2)                                                                         | 150(2)                                                                         | 150(2)                                                                                         |
| Crystal system                                     | Monoclinic                                                                    | Monoclinic                                                                    | Monoclinic                                                                     | Triclinic                                                                      | Triclinic                                                                                      |
| Space group                                        | <i>P</i> 2(1)/ <i>c</i>                                                       | <i>P</i> 2(1)/ <i>c</i>                                                       | <i>P</i> 2(1)/ <i>c</i>                                                        | <i>P</i> -1                                                                    | <i>P</i> -1                                                                                    |
| a (Å)                                              | 16.442(3)                                                                     | 27.590(2)                                                                     | 13.3819(4)                                                                     | 13.7399(12)                                                                    | 13.8204(7)                                                                                     |
| b (Å)                                              | 28.884(5)                                                                     | 11.4039(9)                                                                    | 22.5315(7)                                                                     | 13.7733(13)                                                                    | 14.0460(8)                                                                                     |
| c (Å)                                              | 11.4674(18)                                                                   | 17.0846(14)                                                                   | 19.0121(8)                                                                     | 17.2885(16)                                                                    | 17.8074(10)                                                                                    |
| $\alpha$ (deg)                                     | 90                                                                            | 90                                                                            | 90                                                                             | 81.371(4)                                                                      | 98.3638(19)                                                                                    |
| $\beta$ (deg)                                      | 108.553(6)                                                                    | 101.680(4)                                                                    | 95.058(3)                                                                      | 73.997(3)                                                                      | 99.7094(18)                                                                                    |
| $\gamma$ (deg)                                     | 90                                                                            | 90                                                                            | 90                                                                             | 86.306(4)                                                                      | 99.0951(19)                                                                                    |
| <i>V</i> (Å <sup>3</sup> )                         | 5163.0(15)                                                                    | 5264.0(7)                                                                     | 5710.1(3)                                                                      | 3108.4(5)                                                                      | 3311.4(3)                                                                                      |
| <i>Z</i>                                           | 4                                                                             | 4                                                                             | 4                                                                              | 2                                                                              | 2                                                                                              |
| <i>D</i> <sub>calc</sub> (Mg/m <sup>3</sup> )      | 1.362                                                                         | 1.316                                                                         | 1.320                                                                          | 1.270                                                                          | 1.289                                                                                          |
| $\mu$ (Mo K $\alpha$ )(mm <sup>-1</sup> )          | 0.790                                                                         | 0.774                                                                         | 0.722                                                                          | 0.664                                                                          | 0.706                                                                                          |
| <i>F</i> (000)                                     | 2256                                                                          | 2216                                                                          | 2424                                                                           | 1256                                                                           | 1356                                                                                           |
| Reflections collected                              | 137484                                                                        | 128026                                                                        | 47943                                                                          | 117356                                                                         | 69634                                                                                          |
| No. of parameters                                  | 644                                                                           | 654                                                                           | 694                                                                            | 722                                                                            | 782                                                                                            |
| Indep. reflns ( <i>R</i> <sub>int</sub> )          | 9541(0.1015)                                                                  | 10812(0.0956)                                                                 | 12400(0.1059)                                                                  | 32060(0.0231)                                                                  | 13644(0.0714)                                                                                  |
| <i>R</i> 1[ <i>I</i> > 2 $\sigma$ ( <i>I</i> )]    | 0.0755                                                                        | 0.0655                                                                        | 0.0642                                                                         | 0.0516                                                                         | 0.0572                                                                                         |
| w <i>R</i> 2 [ <i>I</i> > 2 $\sigma$ ( <i>I</i> )] | 0.1397                                                                        | 0.1688                                                                        | 0.1224                                                                         | 0.1344                                                                         | 0.1455                                                                                         |
| Goodness-of-fit on <i>F</i> <sup>2</sup>           | 1.032                                                                         | 1.023                                                                         | 1.023                                                                          | 1.022                                                                          | 1.027                                                                                          |
